# Supplementary material for: Exosomes Derived from Hypoxia-Cultured Human Adipose Stem Cells Alleviate Articular Chondrocyte Inflammaging and Post-Traumatic Osteoarthritis Progression
Source: MDPI journal article supplement (doi:10.3390/ijms241713414), 2023-08-29
Supplement: s1 [file s1]

## Supplementary Figure S1

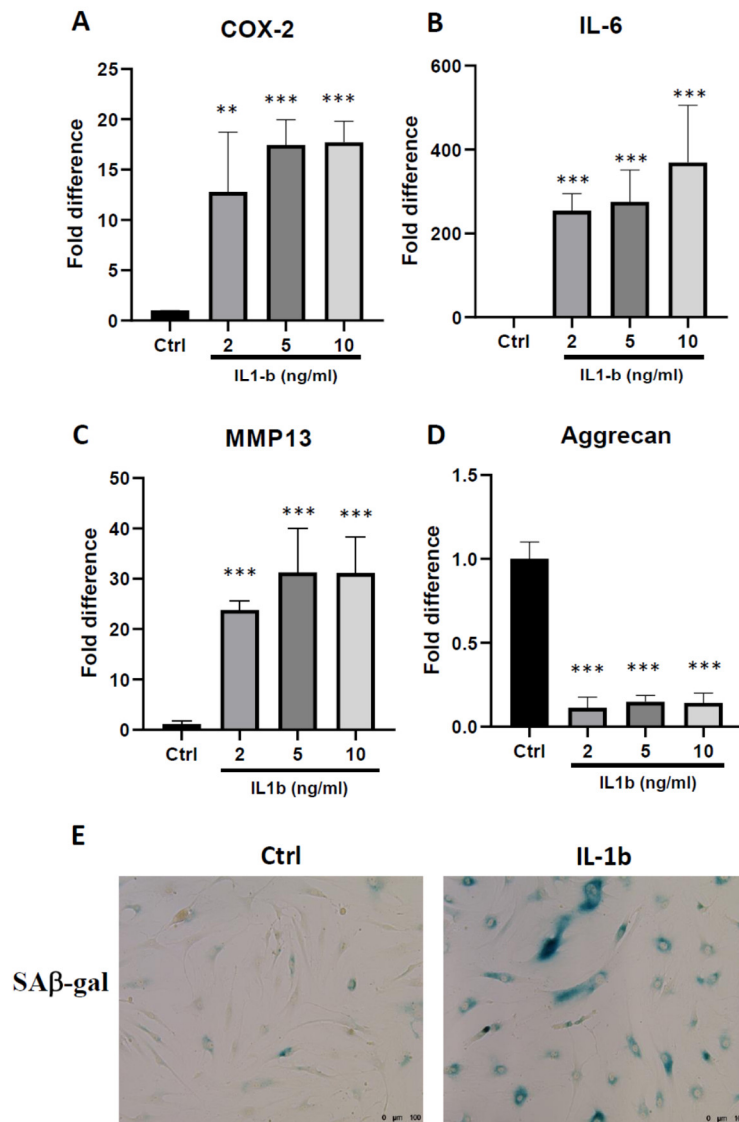

**Figure S1. IL-1 $\beta$  induced OA-like inflammaging in articular chondrocytes.**

A. COX-2, B, IL-6, C, MMP13, and D, Aggrecan mRNA expression in HACs treated with IL-1 $\beta$  (2, 5, 10 ng/mL) for 2 days in vitro. GAPDH mRNA expression was used as the internal control. Each column represents the mean  $\pm$  SEM of three replicate cultures. Data from each group were compared with those of the control group, \*\*,  $P < 0.01$ ; \*\*\*,  $P < 0.001$  compared to the control culture. E. Senescence-associated  $\beta$ -galactosidase (SA- $\beta$ -gal) staining to verify IL-1 $\beta$  (10 ng/mL)-induced OA-like articular chondrocyte senescence. The left panel shows the control culture, and the right panel shows the articular cartilage treated with IL-1 $\beta$  for 12 days (scale bars: 100  $\mu$ m).

## Supplementary Table S1

**Table S1.** Primer sequences used for real-time polymerase chain reaction.

| Gene     | Forward (5' → 3')                    | Reverse (5' → 3')                  |
|----------|--------------------------------------|------------------------------------|
| COL2a1   | CAA CAC TGC CAA CGT CCA<br>GAT       | TCT TGC AGT GGT AGG TGA<br>TGT TCT |
| Aggrecan | ACA GCT GGG GAC ATT AGT<br>GG        | GTG GAA TGC AGA GGT GGT<br>TT      |
| COL10a1  | AGC CAG GGT TGC CAG GAC<br>CA        | TTT TCC CAC TCC AGGAGGGC           |
| PTHrP    | ATG CAG CGG AGA CTG GTT<br>CAG CAG T | GGG AGA GGG CTT GGA GTT<br>AGG GG  |
| ADAMT5   | GCT ACT GCA CAG GGA AGA<br>GG        | TGC ATA TTT GGG AAC CCA TT         |
| MMP13    | TCT TGA GCT GGA CTC ATT<br>GT        | AGC CTC TCA GTC ATG GAG<br>CT      |
| CEBPB    | GAC AAG CAC AGC GAC<br>GAG TA        | AGC TGC TCC ACC TTC TTC TG         |
| PTGS2    | TGA GCA TCT ACG GTT TGC<br>TG        | TGC TTG TCT GGA ACA ACT GC         |
| IL1-b    | ATG ATG GCT TAT TAC AGT<br>GGC AA    | GTC GGA GAT TCG TAG CTG<br>GA      |
| IL6      | AAG ATG GCT GAA AAA GAT<br>GGA TGC   | GTT GGG TCA GGG GTG GTT<br>ATT G   |
| TNFa     | CCC AGG GAC CTC TCT CTA<br>ATC       | ATG GGC TAC AGG CTT GTC<br>ACT     |
| GAPDH    | TCT CCT CTG ACT TCA ACA<br>GCG AC    | CCC TGT TGC TGT AGC CAA<br>ATT C   |

Cycling conditions: Denature: 95°C for 30 s, 95°C for 4 min, followed by 35 cycles of 95°C for 10 s, 55–61°C (shown in column of Annealing Temperature) for 15 s and 72°C for 15 s
